# Supplementary material for: The transcriptional activity of hepatocyte nuclear factor 4 alpha is inhibited via phosphorylation by ERK1/2
Source: PLoS One. 2017 Feb 14;12(2):e0172020. doi: 10.1371/journal.pone.0172020 (PMC5308853; doi:10.1371/journal.pone.0172020)
Supplement: S2 Table — (XLSX) [file pone.0172020.s004.xlsx]

## Sheet: Sheet1
Gene name	P value
BLVRA	0.003699
BLVRB	0.033512
HPD	0.06298
PKLR	0.006287
ABCC6 promoter	0.017394
ABCC6 exon31	0.017394
APOA1	0.02289
